# Supplementary material for: Dysfunction of the intestinal microbiome in inflammatory bowel disease and treatment
Source: Springer Nature journal article supplement (doi:10.1186/gb-2012-13-9-r79), 2012-09-26

Mesalamine (se -0.0545, sd 0.0168, p=0.00135, q=0.0351)

Bacteria|Proteobacteria|Gammaproteobacteria|Enterobacteriales|Enterobacteriaceae|Escherichia/Shigella

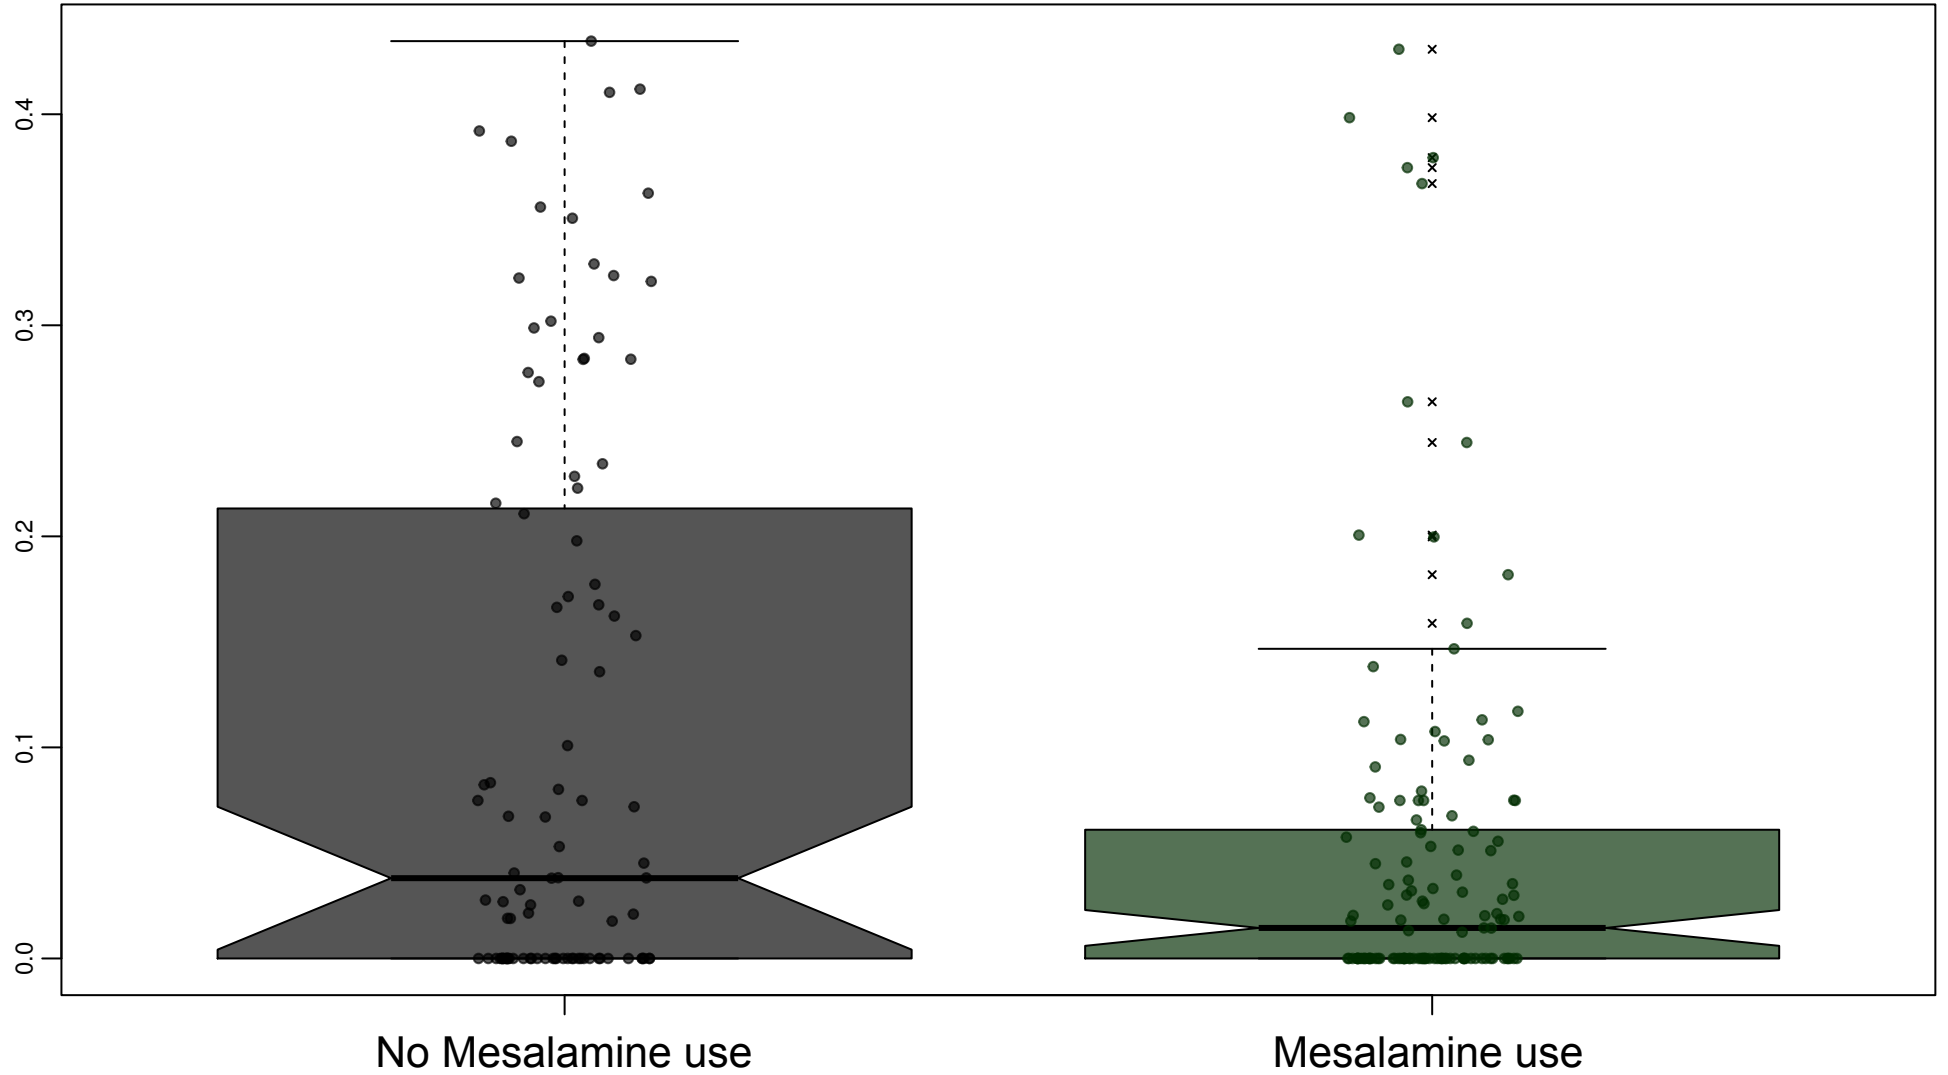

Supplement: 13059_2012_2962_MOESM24_ESM.pdf [file 13059_2012_2962_MOESM24_ESM.pdf]
