# Supplementary material for: Dysfunction of the intestinal microbiome in inflammatory bowel disease and treatment
Source: Springer Nature journal article supplement (doi:10.1186/gb-2012-13-9-r79), 2012-09-26
Supplement: 13059_2012_2962_MOESM25_ESM.pdf [file 13059_2012_2962_MOESM25_ESM.pdf]

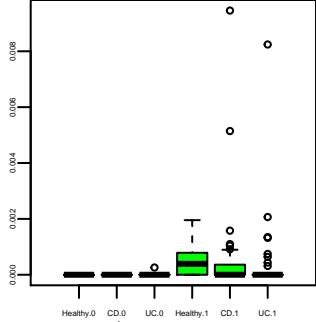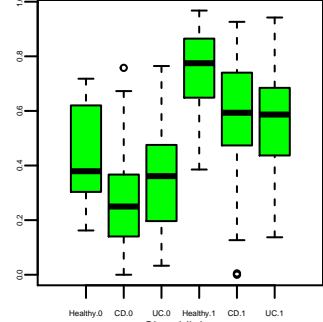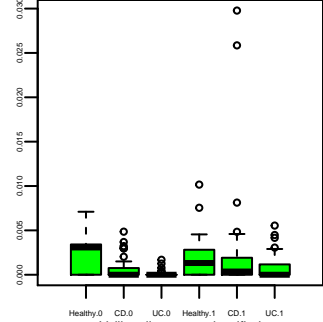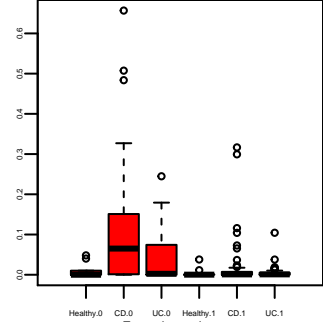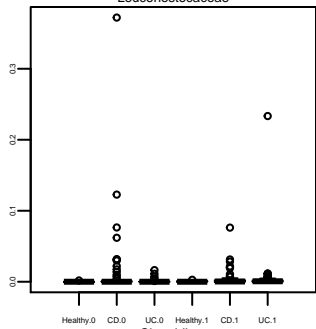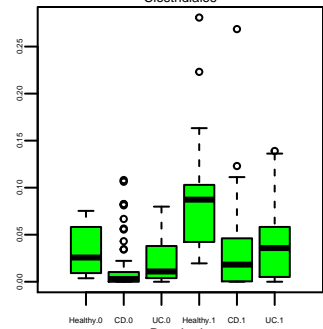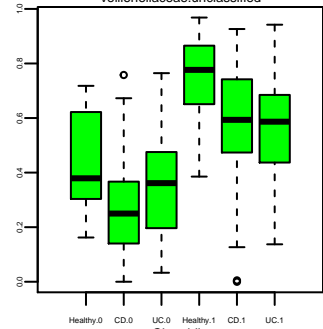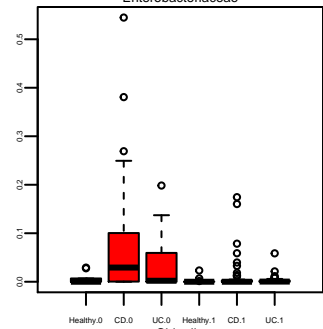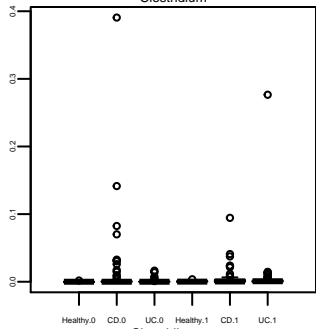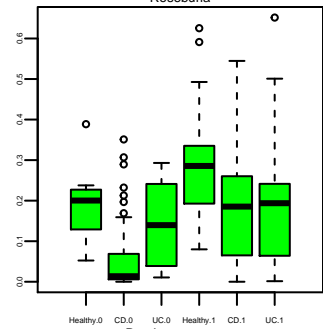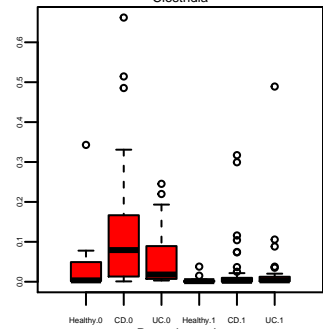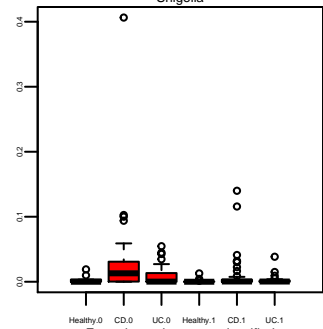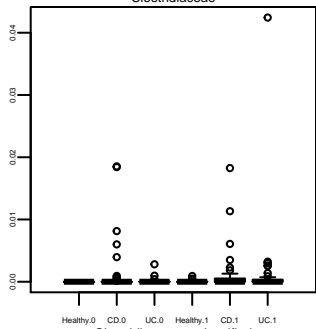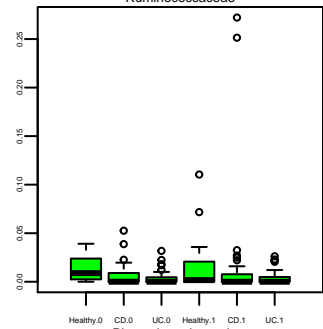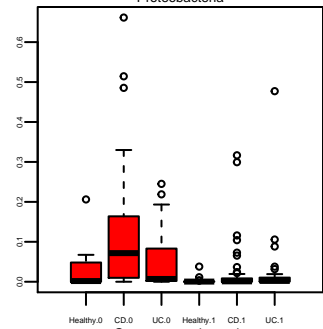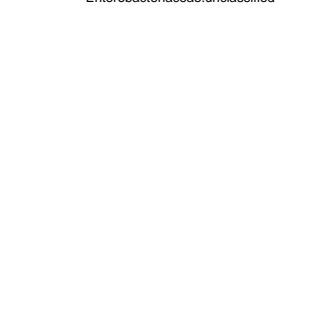

Gamma proteobacteria
