# Supplementary material for: Dysfunction of the intestinal microbiome in inflammatory bowel disease and treatment
Source: Springer Nature journal article supplement (doi:10.1186/gb-2012-13-9-r79), 2012-09-26

# Correlation of microbial gene families estimated from 16S and WGS sequence data

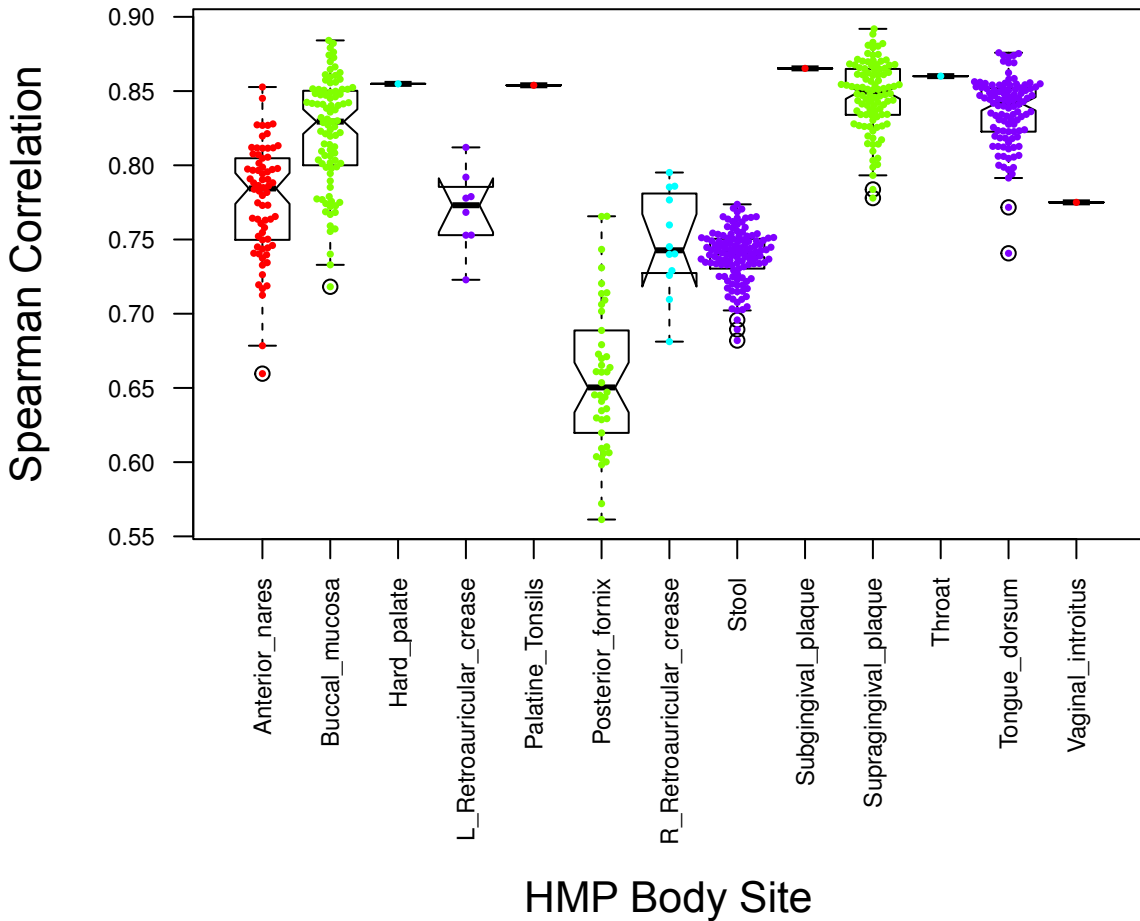

Supplement: 13059_2012_2962_MOESM27_ESM.pdf [file 13059_2012_2962_MOESM27_ESM.pdf]
