# Supplementary figures and images for: Dysfunction of the intestinal microbiome in inflammatory bowel disease and treatment
Source: Springer Nature journal article supplement (doi:10.1186/gb-2012-13-9-r79), 2012-09-26

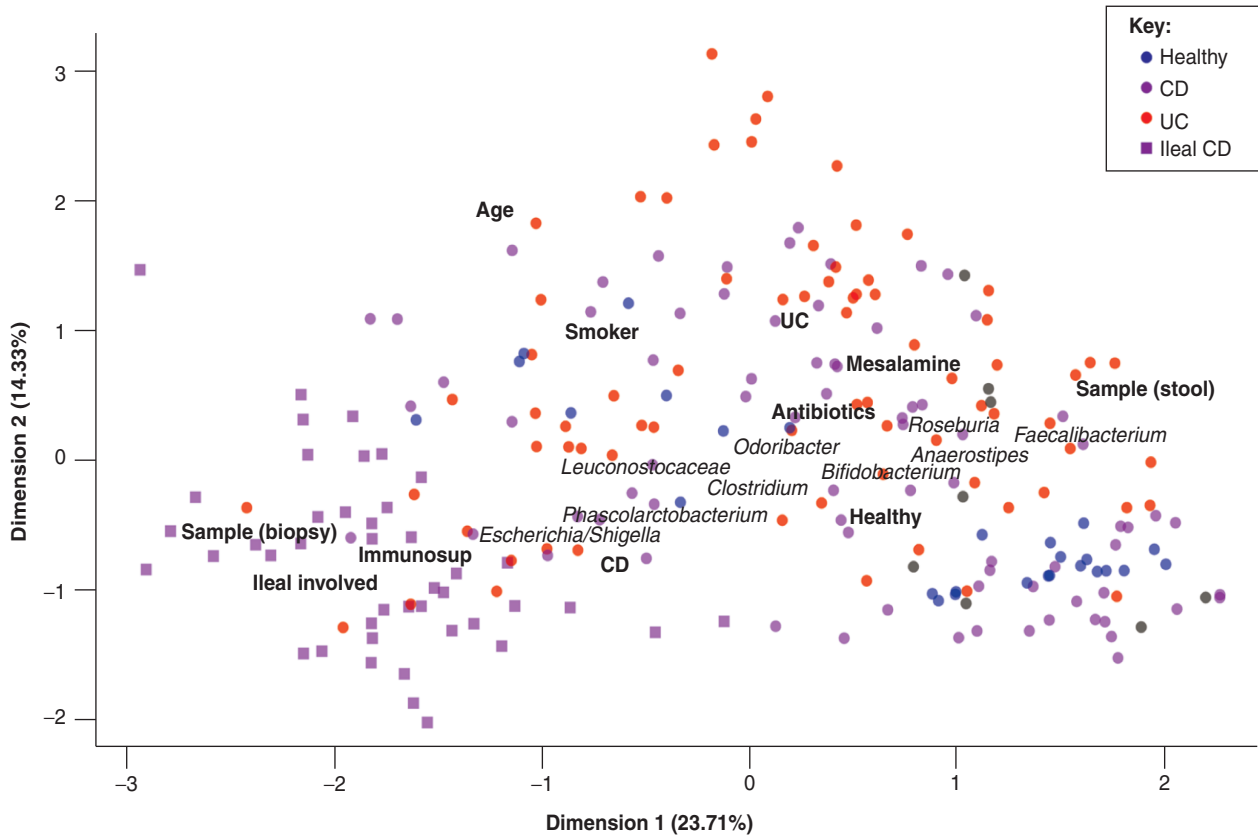

Supplement: 13059_2012_2962_MOESM16_ESM.pdf [file 13059_2012_2962_MOESM16_ESM.pdf]

# Taxa associated with host environment

## Smoking

## Antibiotics use

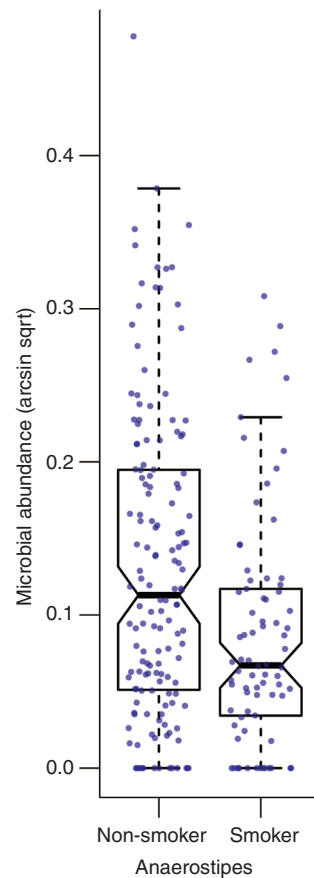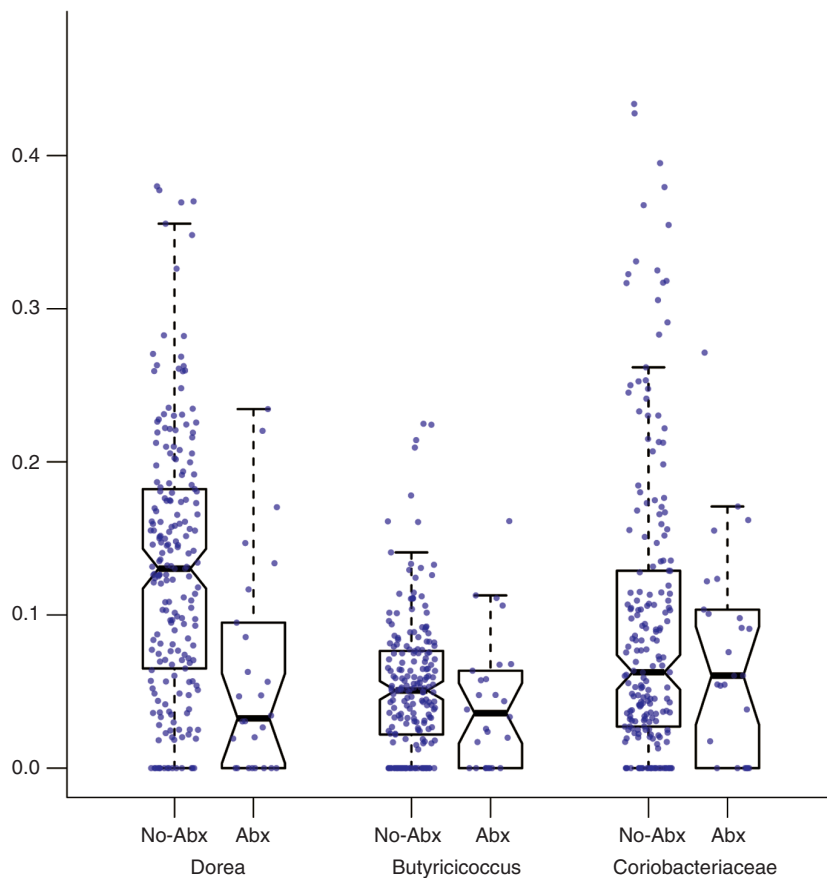

Supplement: 13059_2012_2962_MOESM18_ESM.pdf [file 13059_2012_2962_MOESM18_ESM.pdf]

# Microbial functions (KEGG pathways) differentially abundant in IBD

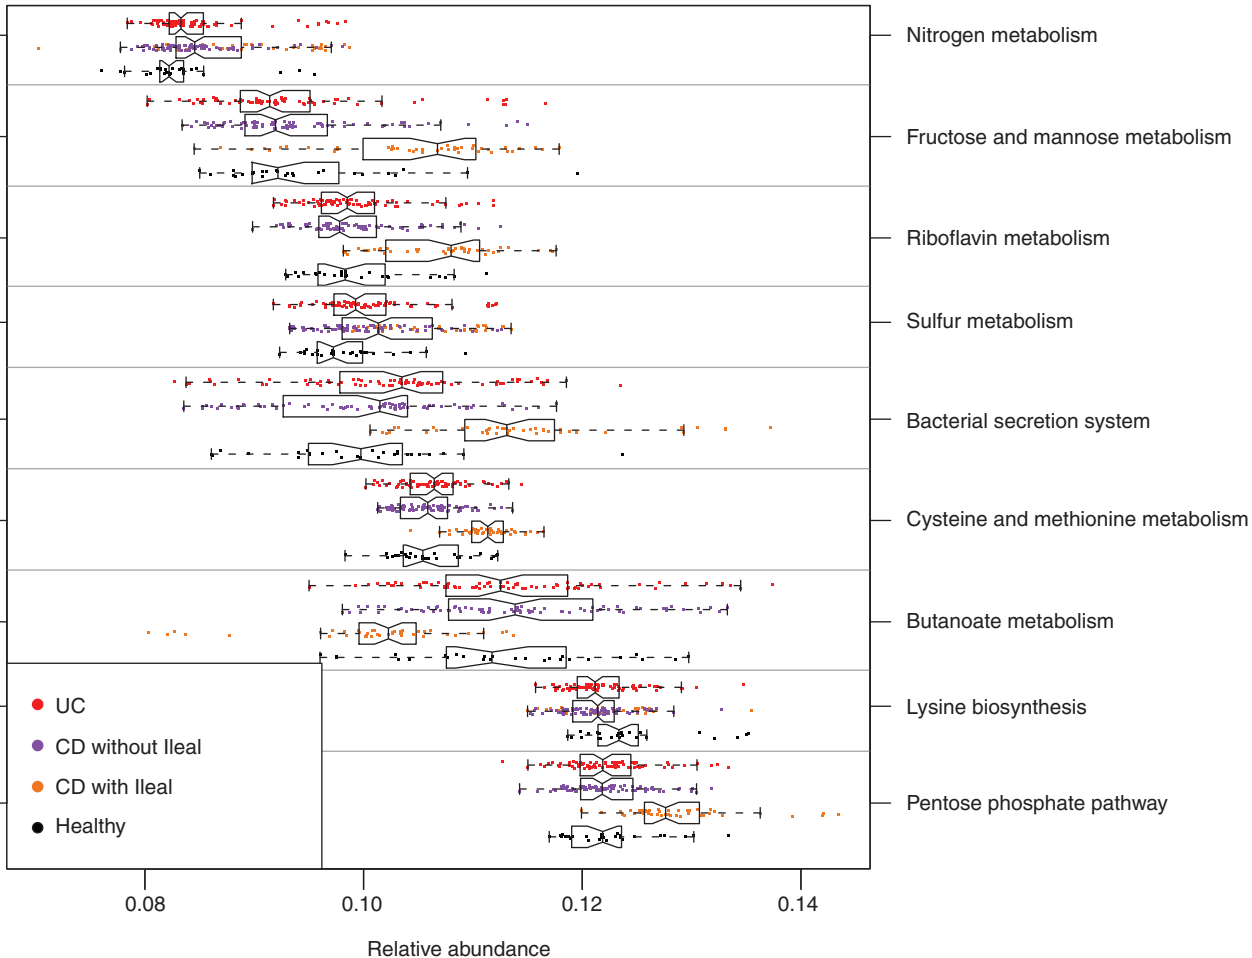

Supplement: 13059_2012_2962_MOESM19_ESM.pdf [file 13059_2012_2962_MOESM19_ESM.pdf]

**(a) Microbial metabolism (KEGG modules and GO Terms) differentially abundant in IBD**

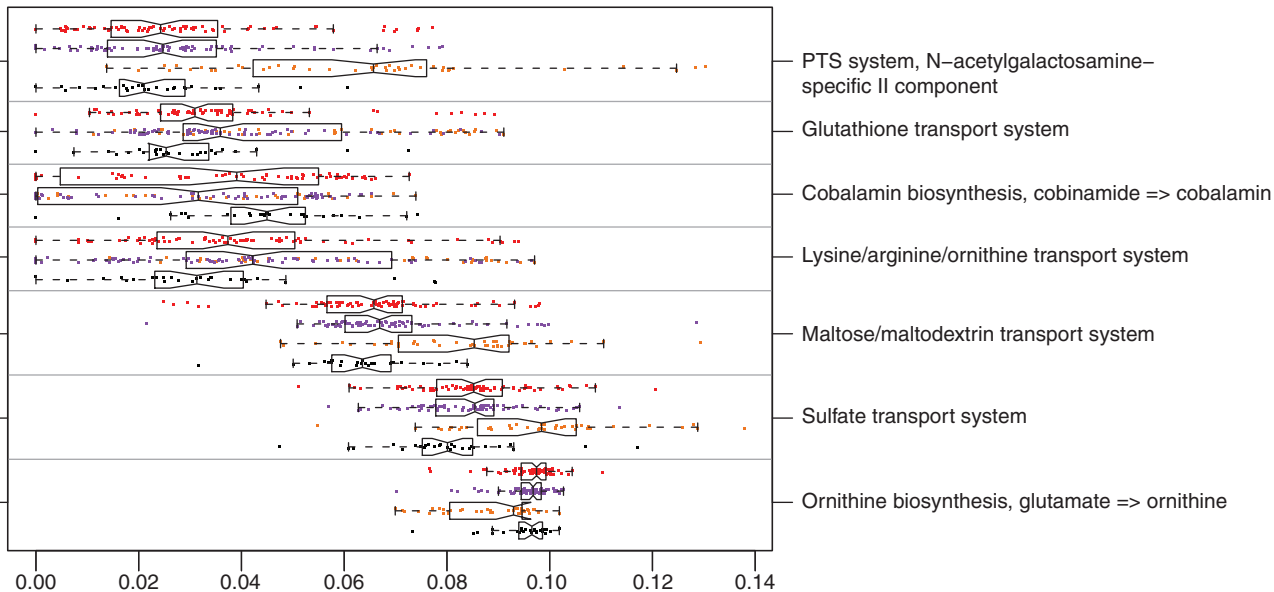

**(b)**

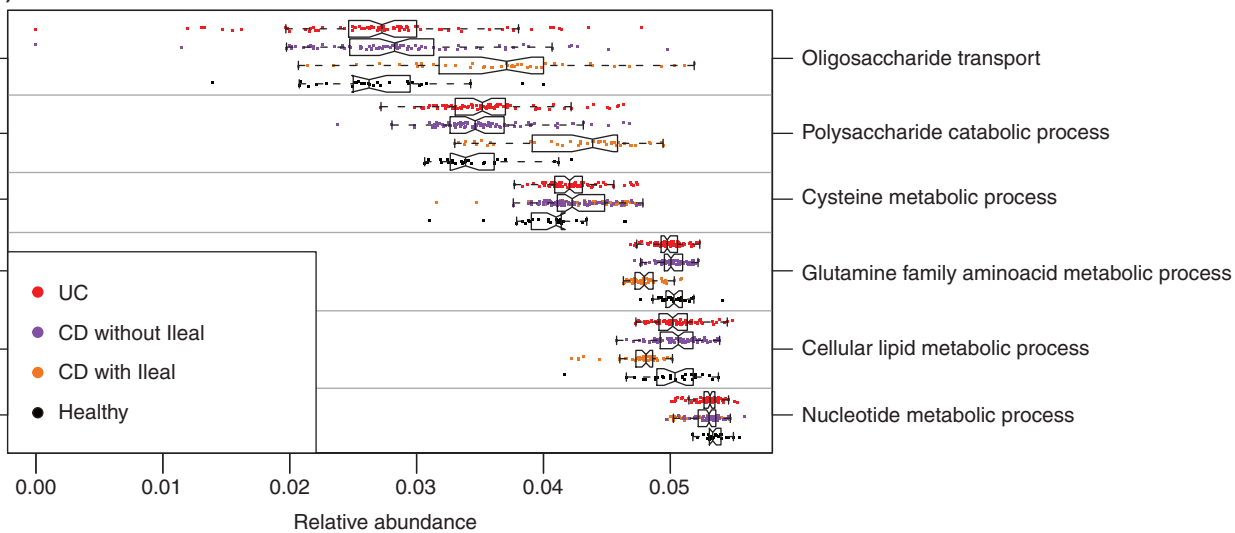

Supplement: 13059_2012_2962_MOESM20_ESM.pdf [file 13059_2012_2962_MOESM20_ESM.pdf]
